# Supplementary material for: DCLK1 is a broadly dysregulated target against epithelial-mesenchymal transition, focal adhesion, and stemness in clear cell renal carcinoma
Source: PubMed Central journal article supplement (PMC4385845; doi:10.18632/oncotarget.3059), 2014-12-11
Supplement: oncotarget-06-2193-s001.pdf [file oncotarget-06-2193-s001.pdf]

## DCLK1 is a broadly dysregulated target against epithelial-mesenchymal transition, focal adhesion, and stemness in clear cell renal carcinoma

### Supplementary Material

**Supplementary Table I.** Clinical Characteristics of TCGA KIRC Patients Studied.

| <b>Parameter</b>      | <b>Males</b> | <b>Females</b> | <b>Overall</b> |
|-----------------------|--------------|----------------|----------------|
| <b>Sample Size</b>    | 330          | 173            | 503            |
| <b>Mean Age</b>       | 59.4         | 62.9           | 60.6           |
| <b>Median Age</b>     | 59           | 64             | 61             |
| <b>95% C.I. (Age)</b> | 58.1 - 60.7  | 61.1 - 64.8    | 59.5 - 61.7    |
| <b>% Metastatic</b>   | 16.67%       | 13.29%         | 15.51%         |
| <b>% Fatal</b>        | 31.51%       | 35.26%         | 32.80%         |
| <b>Ethnicity</b>      |              |                |                |
| <i>White</i>          | 306          | 152            | 458            |
| <i>Black/African</i>  | 20           | 17             | 37             |
| <i>Asian</i>          | 4            | 4              | 8              |

**Supplementary Table II.** Primers Used in Real Time RT-PCR Experiments.

| <b>Gene ID</b> | <b>Forward (5' – 3')</b>    | <b>Reverse (5' – 3')</b> |
|----------------|-----------------------------|--------------------------|
| MYC            | CACACATCAGCACAACACTACGCA    | TTGACCCTCTTGGCAGGCAG     |
| DCLK1          | TAGCCAGCGCCATCAAATAC        | ACCCAGCTTCAGTGATTTGC     |
| TWIST1         | GCCGGAGACCTAGATGTCATTG      | AGTTATCCAGCTCCAGAGTCTC   |
| NANOG          | ACCAGAACTGTGTTCTCTCCACC     | CCATTGCTATTCTTCGGCCAGTTG |
| SOX2           | CGAGATAAACATGGCAATCAAAT     | AATTCAGCAAGAAGCCTCTCCTT  |
| SNAI1          | GCCATGTCCGGACCCACACTG       | GGCAGGGGCAGGTATGGAGA     |
| ZEB1           | AAGAATTCACAGTGGAGAGAGAAGCCA | CGTTTCTTGCAGTTTGGGCATT   |
| ACTB           | GCTGATCCACATCTGCTGG         | ATCATTGCTCCTCCTGAGCG     |
| POU5F1         | AAGCGATCAAGCAGCGACTAT       | GGAAAGGGACCGAGGAGTACA    |
| SNAI2          | AAGGCCTTCTCTAGGCCCT         | CGCAGGTTGAGCGGTCAG       |

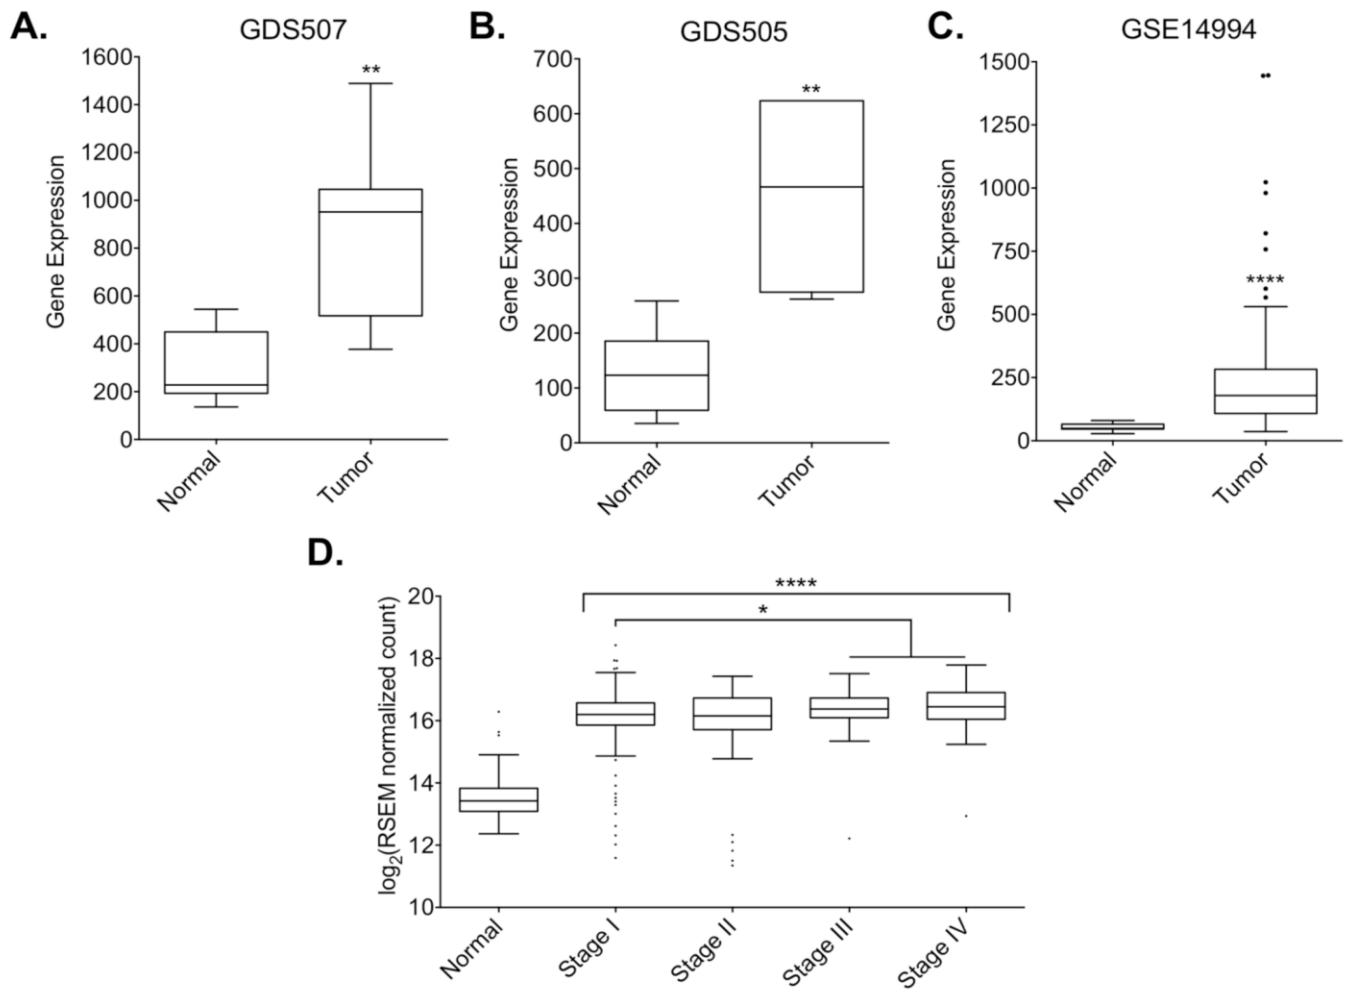

**Supplementary Figure 1. A-C)** The DCLK1 gene is overexpressed in RCC microarray data from the NCBI gene expression omnibus. **D)** Vimentin is overexpressed in RCC and demonstrates a significant increase in stages III-IV compared to stage I.

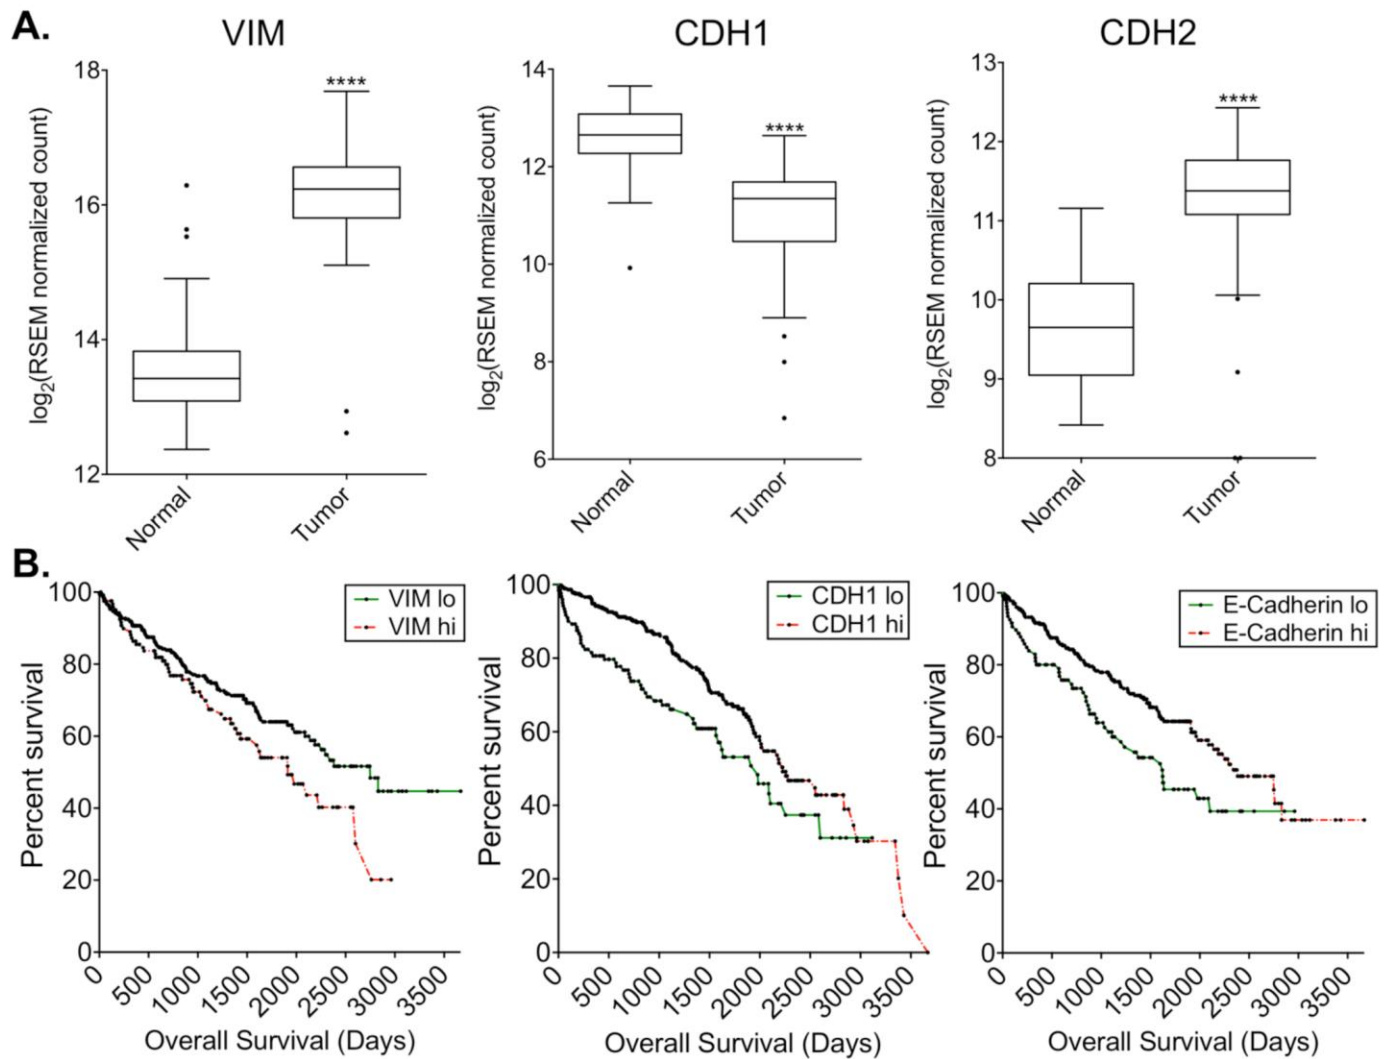

**Supplementary Figure 2. A)** Mesenchymal gene expression (VIM and CDH2) is upregulated and epithelial gene expression (CDH1) is downregulated in RCC. **B)** High VIM gene expression and low CDH1/E-cadherin gene and protein expression are correlated to significantly decreased survival in RCC.

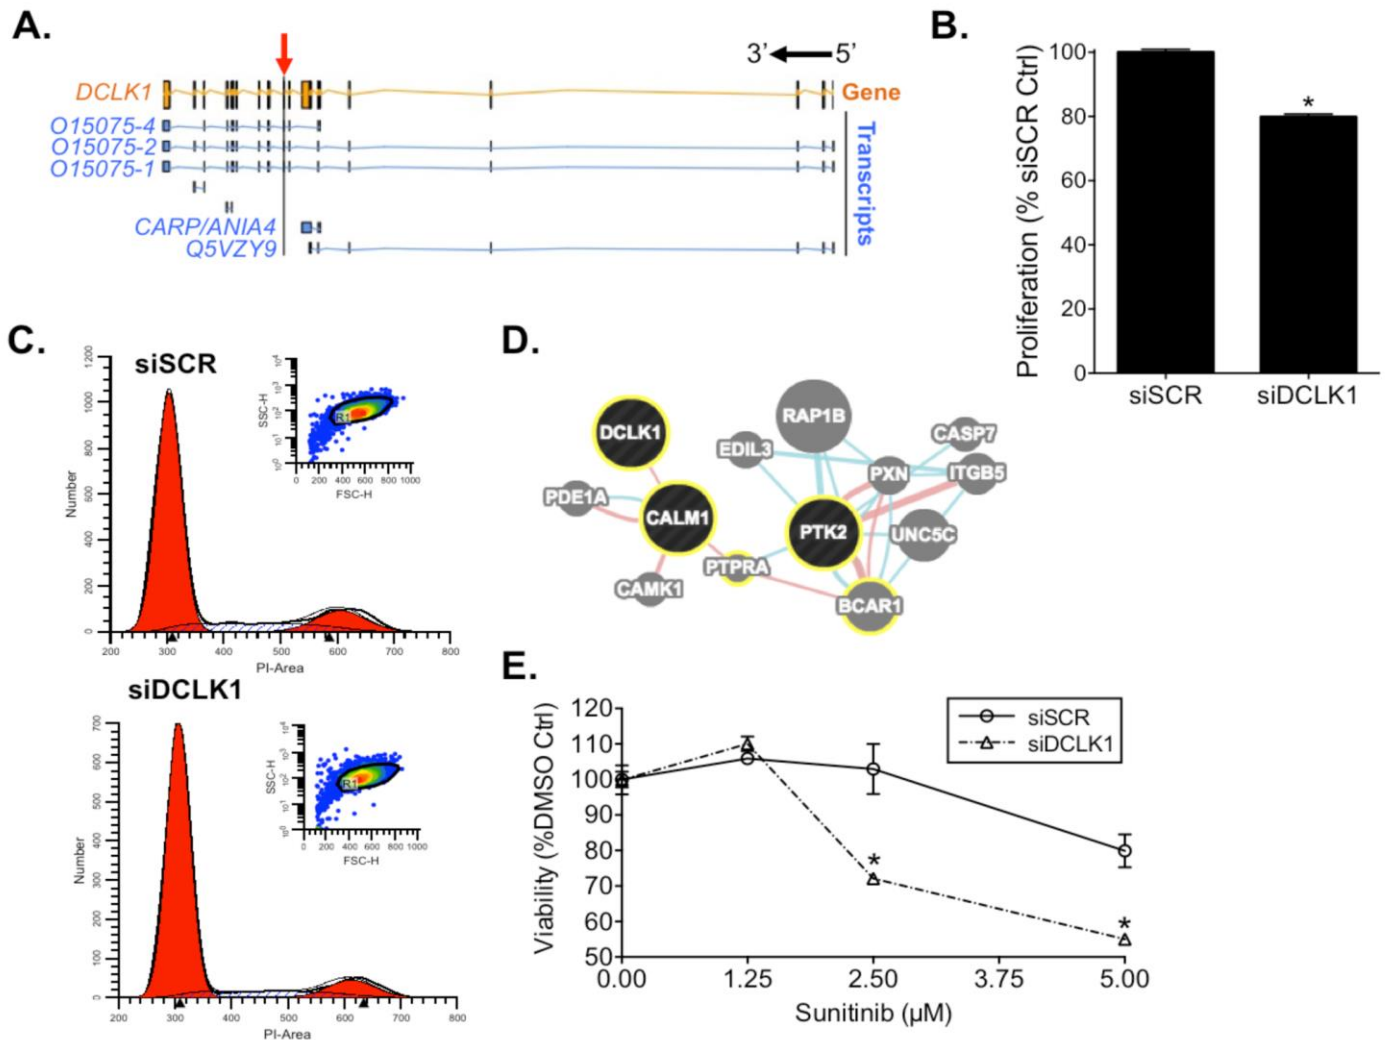

**Supplementary Figure 3. A)** Genomic coordinates of region targeted by DCLK1 siRNA. **B)** siDCLK1 transfection significantly reduces Caki-2 cell proliferation relative to siSCR transfection. **C)** siDCLK1 transfection does not alter the cell cycle status of Caki-2 cells. **D)** Genemania network analysis of DCLK1's interaction with PTK2/FAK demonstrating that DCLK1 physically interacts with calmodulin-1 (CALM1), which physically interacts with PTK2/FAK through PTPRA. **E)** To investigate whether siDCLK1 sensitizes RCC cells to receptor tyrosine kinase inhibitors, Caki-2 cells pretreated with either siDCLK1 or siSCR were seeded into a 96-well plate and treated with DMSO (vehicle), 5, or 10  $\mu\text{M}$  sunitinib for 48 h. Following treatment a proliferation assay was performed and demonstrated that siDCLK1 sensitizes Caki-2 cells to sunitinib ( $p < 0.0002$ ).
